RESEARCH ARTICLE

# Diurnal Patterns and Correlates of Older Adults' Sedentary Behavior

Jelle Van Cauwenberg<sup>1,2,3\*</sup>, Veerle Van Holle<sup>3,4</sup>, Ilse De Bourdeaudhuij<sup>4</sup>, Neville Owen<sup>5</sup>, Benedicte Deforche<sup>1,2</sup>

**1** Department of Public Health, Faculty of Medicine and Health Sciences, Ghent University, Ghent, Belgium, **2** Department of Human Biometry and Biomechanics, Faculty of Physical Education and Physical Therapy, Vrije Universiteit Brussel, Brussels, Belgium, **3** Fund for Scientific Research Flanders (FWO), Brussels, Belgium, **4** Department of Movement and Sport Sciences, Faculty of Medicine and Health Sciences, Ghent University, Ghent, Belgium, **5** Baker IDI Heart and Diabetes Institute, The University of Queensland, Melbourne University and Monash University, Melbourne, Australia

\* [jelle.vancauwenberg@ugent.be](mailto:jelle.vancauwenberg@ugent.be)

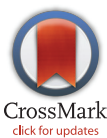

## Abstract

### Introduction

Insights into the diurnal patterns of sedentary behavior and the identification of subgroups that are at increased risk for engaging in high levels of sedentary behavior are needed to inform potential interventions for reducing older adults' sedentary time. Therefore, we examined the diurnal patterns and sociodemographic correlates of older adults' sedentary behavior(s).

### Methods

Stratified cluster sampling was used to recruit 508 non-institutionalized Belgian older adults ( $\geq 65$  years). Morning, afternoon, evening and total sedentary time was assessed objectively using accelerometers. Specific sedentary behaviors, total sitting time and sociodemographic attributes were assessed using an interviewer-administered questionnaire.

### Results

Participants self-reported a median of 475 (Q1-Q3 = 383–599) minutes/day of total sitting time and they accumulated a mean of  $580 \pm 98$  minutes/day of accelerometer-derived sedentary time. Sedentary time was lowest during the morning and highest during the evening. Older participants were as sedentary as younger participants during the evening, but they were more sedentary during daytime. Compared to married participants, widowers were more sedentary during daytime. Younger participants ( $< 75$  years), men and the higher educated were more likely to engage in (high levels of) sitting while driving a car and using the computer. Those with tertiary education viewed 29% and 22% minutes/day less television compared to those with primary or secondary education, respectively. Older participants accumulated 35 sedentary minutes/day more than did younger participants and men accumulated 32 sedentary minutes/day more than did women.

## OPEN ACCESS

**Citation:** Van Cauwenberg J, Van Holle V, De Bourdeaudhuij I, Owen N, Deforche B (2015) Diurnal Patterns and Correlates of Older Adults' Sedentary Behavior. PLoS ONE 10(8): e0133175. doi:10.1371/journal.pone.0133175

**Editor:** Maciej Buchowski, Vanderbilt University, UNITED STATES

**Received:** February 11, 2015

**Accepted:** June 23, 2015

**Published:** August 5, 2015

**Copyright:** © 2015 Van Cauwenberg et al. This is an open access article distributed under the terms of the [Creative Commons Attribution License](https://creativecommons.org/licenses/by/4.0/), which permits unrestricted use, distribution, and reproduction in any medium, provided the original author and source are credited.

**Data Availability Statement:** All relevant data are within the paper.

**Funding:** This study was supported by Research Foundation Flanders (FWO) ([www.fwo.be](http://www.fwo.be), 11N0313N and 11O3115N); JVC and VVH, National Health and Medical Research Council of Australia Program Grant (#569940), a Senior Principal Research Fellowship (#1003960) and by the Victorian Government's Operational Infrastructure Support program: NO. The funders had no role in study design, data collection and analysis, decision to publish, or preparation of the manuscript.

**Competing Interests:** The authors have declared that no competing interests exist.

## Conclusion

These findings highlight diurnal variations and potential opportunities to tailor approaches to reducing sedentary time for subgroups of the older adult population.

## Introduction

The health benefits of regular moderate-to-vigorous intensity physical activity for older adults are well-established [1]. Recently, sedentary behaviors, defined as involving prolonged sitting and low levels of energy expenditure [2,3], have been found to be associated with type 2 diabetes, cardiovascular morbidity and premature mortality, independent to the influence of moderate-to-vigorous physical activity [4,5,6,7]. In older adults—the most sedentary age group [8,9]—high levels of sedentary time have been linked to decreased functional fitness [10], increased risk of invasive breast cancer [11], increased metabolic risk, overweight and obesity [12,13,14,15], and higher mortality rates [16,17]. Sedentary time has been reported to reach 10h/day among older adults in the USA [8] and has been found to account for some 75% of Icelandic older adults' waking time [18]. In order to develop a taxonomy of sedentary behaviors, Chastin et al. [19] conducted a Delphi expert consensus process. The resulting taxonomy proposes that sedentary behaviors can be seen as complex and multi-faceted behaviors, which can be differentiated by their purpose, environment, type, posture, social nature, timing, state of the individual, associated behaviors and measurement. As described in this taxonomy, engagement in sedentary behavior may vary throughout the day [19]. Insights into the diurnal patterns of older adults' sedentary behavior can help to inform the development of interventions, through identifying those segments of the day (morning, afternoon or evening, for example) that may be targeted to reduce older adults' sedentary time most effectively. Such a diurnal pattern has been observed for older adults' physical activity, with older adults being especially inactive during the evening [18,20,21]. While less is known about the diurnal patterns of older adults' sedentary behaviors, an intervention trial with a small sample of Australian older adults did identify lower volumes of accelerometer-measured sedentary time during the morning, versus the afternoon and evening time [22].

Similar to physical activity, overall sedentary time can encompass several particular behaviors (television viewing, driving, working at a computer, etc.). The multi-faceted nature of sedentary behavior [19] implies that reducing particular sedentary behaviors will require different intervention strategies [23] and different sedentary behaviors might have different health outcomes [24,25]. For example, among Asian adults [25], television viewing time but not computer and reading time was found to be adversely associated with several cardio-metabolic biomarkers. Furthermore, despite the health risks of excessive sitting, some particular sedentary behaviors might entail some benefits for older adults (e.g. computer use to maintain cognitive functioning or car driving to remain mobile) [24,26,27]. This suggests the need to not only examine overall sedentary time but also particular sedentary behaviours among older adults. While devices such as accelerometers can provide an objective measure of older adults' overall sedentary time, self-report methods are needed to assess engagement in particular sedentary behaviors [8].

Now that the health risks of sedentary behaviors have become apparent, a next phase in the public health research strategy is the identification of subgroups at increased risk for engaging in high levels of particular sedentary behaviors [28]. Furthermore, examining differences in diurnal patterns, total sedentary time and particular sedentary behaviors between subgroups

(based on age, gender, marital status, and educational level) can identify subgroups that are most in need for interventions aiming to reduce the particular subsets of sedentary behavior [23].

We examined diurnal patterns of accelerometer-derived measurements, to identify morning, afternoon, and evening levels of sedentary time and whether diurnal patterns differed between older adult subgroups (based on age, gender, marital status, and educational level). We also examined sociodemographic correlates of older adults' sedentary time and particular sedentary behaviors.

## Methods

### Procedures

Data were collected as part of the Belgian Environment and Physical Activity Study–Seniors (BEPAS-Seniors), which has been described elsewhere [29]. Briefly, participants were recruited and visited at home within 20 neighborhoods in Ghent (Belgium). Ghent is a medium-sized city in Flanders (the Northern, Dutch-speaking part of Belgium). Belgium has a Human Development Index (HDI) of 0.881 (HDI rank = 21) [30]. Ghent consists of 14 boroughs and had 247,941 inhabitants and a residential density of 1,570 inhabitants/km<sup>2</sup> in 2012. Ghent hosts several tertiary education institutions with a total of 68,039 students. The old age dependency ratio (number of older adults / number of 20-to-64-year-olds) and the unemployment rate were 27 and 7%, respectively [31,32].

The 20 neighborhoods were selected from the 201 existing statistical sectors in Ghent. A statistical sector includes about 1,000 inhabitants and it is the smallest unit for which sociodemographic information is available in Belgium. Each neighborhood contained one to five adjacent statistical sectors. Neighborhood selection was based on maximizing the variability in neighborhood environmental characteristics (i.e., neighborhood walkability) and mean annual household income per neighborhood. Stratified sampling based on gender and age (65–74 vs.  $\geq 75$  years) was used to recruit participants within each neighborhood. The legal pension age in Belgium is 65 years, the average age at retirement is 59.5 years [33] and we visited the participants at home during daytime, therefore, it can be assumed that almost all of the participants were retired. For inclusion, participants had to be non-institutionalized and not limited by their health to walk a couple of 100 meters. This resulted in 508 participating, yielding a response rate of 44.8% (508/1,135 eligible participants found at home). Data were collected by trained researchers between September 2010 and October 2012. The study protocol was approved by the Ghent University Hospital.

During a first home visit written informed consent was obtained and a structured interview assessed health status, physical activity and sedentary behaviors. The participant was also provided with an accelerometer to wear during the next seven days and an appointment for a second home visit approximately eight days later was made. During this second home visit a structured interview assessed sociodemographics, weight and height were measured and the accelerometer was collected.

### Measures

**Sociodemographics and health status.** The following sociodemographic factors were assessed: age, gender, marital status, educational level, and (former) occupation. Age was dichotomized into 65–74 years and  $\geq 75$  years. Participants were asked for their current marital status: married, widowed, divorced, never been married or cohabiting. Based on exploratory analyses the categories of married and cohabiting and the categories divorced and never been married were collapsed. Educational level was assessed as follows: “What is the highest

educational degree that you have obtained?”. Six possible answers were provided ranging from primary education to university. These categories were recoded into: primary, secondary, and tertiary education.

The validated SF-36 [34,35] was used to assess self-rated health (excellent, very good, good, fair or poor) and health limitations to walk more than 1 km (severely, somewhat or not limited). To calculate BMI, height and weight were measured with a SECA 214 stadiometer and a SECA 813 Robusta weight scale up to 0.1 cm and 0.1 kg, respectively.

**Accelerometer-derived sedentary time.** Participants were instructed to wear an Actigraph GT3X+ accelerometer for seven consecutive days. Data registration occurred in 1 min epochs. Twenty-eight participants had no accelerometer data due to device-failure. A period of at least 90 minutes of consecutive zeros was defined as non-wear time [36]. A valid day was defined as a day that contained at least 10 hours of accelerometer data and participants with less than five valid days were excluded from further analyses ( $n = 25$ ) [37,38]. Participants with more than 18 valid hours/day were also excluded ( $n = 6$ ). Minutes with less than 100 activity counts were defined as sedentary minutes [39,40]. Moderate-to-vigorous physical activity (MVPA) was defined as  $\geq 1952$  counts per minute [41]. Accelerometer-derived sedentary time and MVPA were expressed in minutes/day. To examine the diurnal pattern of sedentary time, days were divided into three segments: morning (7h–12h), afternoon (12h–17h), and evening (17h–23h). These segments were selected based on an exploratory analysis of the data. Within each segment, average minutes of sedentary time/hour and MVPA/hour were calculated.

**Self-reported sedentary behaviors.** Participants completed an interview-administered sedentary behavior questionnaire including 12 particular sedentary behaviors; TV viewing, computer use, reading, sedentary hobbies (e.g. handicraft, playing cards), talking/listening to music, telephone use, public transport, driving a car, being passenger in a car, sitting during household chores, resting, and eating. This questionnaire first assessed how many days a certain sedentary behavior was performed in the last seven days. Then it prompted how long, on average, the participant engaged in that sedentary behavior on such a day. The average daily time spent in these sedentary behaviors was calculated: (number of days engaged in the behavior \* average time engaged in the behavior on such a day) / 7. The average daily times spent in the different sedentary behaviors were summed to create the variable ‘self-reported total sitting time’. Acceptable test-retest reliability ( $ICC > 0.70$ ) was found for TV viewing, computer use, driving a car, and total sitting time [42]. These variables acted as dependent variables in the current study. Participants with self-reported total sitting times higher than 18h/day ( $n = 7$ ) were excluded. This resulted in the inclusion of 442 participants with complete questionnaire and accelerometer data with a mean of  $15.0 \pm 1.4$  valid accelerometry hours/valid day. Participants with valid questionnaire and accelerometer data were significantly younger ( $74.2 \pm 6.2$  vs.  $76.3 \pm 6.4$  years,  $t = -2.5$ ,  $p = 0.01$ ) and had a lower BMI ( $22.3 \pm 3.6$  vs.  $23.7 \pm 3.9$   $\text{kg}/\text{m}^2$ ,  $t = -2.8$ ,  $p = 0.01$ ) than participants with invalid data. Participants with valid versus invalid questionnaire and accelerometer data did not differ in their gender distribution, marital status, education level and self-rated health (all  $p$ 's  $> 0.05$ ). Correlation analysis between self-reported total sitting time and accelerometer-derived sedentary time yielded a Spearman's  $\rho$  of 0.30 ( $p < 0.001$ ) [42].

## Statistical analyses

Statistical analyses were performed using R version 3.03 and significance level was defined at 0.05. All analyses were adjusted for accelerometer-derived MVPA. Analyses with accelerometer-derived sedentary time as the dependent variable were also adjusted for number of valid days and average number of valid hours/valid day.

**Diurnal patterns of accelerometer-derived sedentary time.** To identify the diurnal patterns of accelerometer-derived sedentary time, 3-level models were constructed (segment of the day clustered within participants and participants clustered within neighborhoods) using the LMER-function available in the lme4-package (<http://cran.r-project.org/web/packages/lme4/index.html>). Since the dependent variable was normally distributed, general linear mixed models were fitted using maximum likelihood. First, we ran a basic model that included the main effects of diurnal pattern, adjusted for accelerometer-derived MVPA, number of valid days and average number of valid hours/valid day. Second, we added the four sociodemographic factors to this basic model. Third, we constructed four separate models by adding the interaction effect between diurnal pattern and one of the sociodemographic factors to the model fitted in step 2. Fourth, we combined all significant interaction effects observed in step 3 into the model fitted in step 2. Finally, non-significant interaction effects were deleted from the model. Graphs were created to facilitate interpretation of the interaction effects [43].

**Sociodemographic correlates of sedentary behaviors.** All dependent variables, except for accelerometer-derived sedentary time, were non-normally distributed. Therefore, generalized linear mixed models (GLMMs), adjusting for the clustering of participants within neighborhoods, were fitted with the GLMER-function available in the lme4-package [44]. Appropriate variance and link functions were selected based on Akaike's Information Criterion (AIC). For accelerometer-derived sedentary time, a general linear mixed model was fitted (i.e. a Gaussian variance and identity link function) using maximum likelihood. A GLMM with gamma variance and log link function was selected for the dependent variables 'TV viewing' and 'total self-reported sitting time'. Since the dependent variables 'driving a car' and 'computer use' contained an excessive number of zeros, hurdle models were fitted to these variables: within a hurdle model, two separate analyses are performed. First, a logistic regression model was fitted to estimate the relationship with the odds of participation in (any) car driving/computer use. Secondly, a gamma regression model with log link function was fitted to estimate the relationship with the amount of car driving/computer use among those participants that reported any car driving/computer use in the last 7 days. GLMMs were fitted by Adaptive Gauss-Hermite Quadrature with 25 quadrature points [44]. A backward selection procedure based on the AIC was performed to select the included variables. This implies that the final models included the sociodemographic variables that improved the model fit (irrespective whether they were significantly related to the dependent variable) and accelerometer-derived MVPA.

## Results

### Sample characteristics

[Table 1](#) presents the sample's descriptive characteristics. Participants had a mean age of  $74 \pm 6$  years and 55% were women. Most participants (66%) were married or cohabiting, 38% had followed tertiary education and 55% had performed a white collar job. Mean BMI was  $22 \pm 4$  kg/m<sup>2</sup>, 18% rated their health to be fair or poor and 27% reported to be limited by their health to walk more than one kilometer. Participants reported a median sitting time while driving a car of 9 (Q1-Q3 = 0–23), while using the computer of 0 (Q1-Q3 = 0–60) and while viewing television of 177 (Q1-Q3 = 90–240) minutes/day. Participants self-reported a median of 475 (Q1-Q3 = 383–599) minutes/day of total sitting time and accumulated a mean of  $580 \pm 98$  minutes/day of accelerometer-derived sedentary time. In comparison to the Flemish population of older adults, our sample was highly educated (38 vs. 16% with tertiary education) [45], had a lower BMI (a mean of 22 vs. 26 kg/m<sup>2</sup>) [46] and viewed less television (a mean of 170 vs. 255 minutes/day) [47].

**Table 1. Descriptive Characteristics of the Sample.**

| Characteristics                                             | Total sample(n = 442) |
|-------------------------------------------------------------|-----------------------|
| Age (M ± SD)                                                | 74.2 ± 6.2            |
| Gender (% women)                                            | 54.8                  |
| Marital status (%)                                          |                       |
| Widowed                                                     | 21.2                  |
| Never married / divorced                                    | 12.7                  |
| Married / cohabiting                                        | 66.1                  |
| Educational level (%)                                       |                       |
| Primary education                                           | 25.8                  |
| Secondary education                                         | 36.1                  |
| Tertiary education                                          | 38.1                  |
| Occupation (%)                                              |                       |
| Household                                                   | 18.0                  |
| Blue collar                                                 | 26.9                  |
| White collar                                                | 55.1                  |
| BMI (M ± SD)                                                | 22.3 ± 3.6            |
| Self-rated health (% fair/poor) <sup>a</sup>                | 18.1                  |
| % limited to walk more than 1 km <sup>a</sup>               | 26.5                  |
| Accelerometer-derived MVPA (Med; Q1-Q3) <sup>b</sup>        | 10.4; 3.4–23.9        |
| Driving a car (Med; Q1-Q3) <sup>b</sup>                     | 8.6; 0.0–22.9         |
| Computer use (Med; Q1-Q3) <sup>b</sup>                      | 0.0; 0.0–60.0         |
| TV viewing (Med; Q1-Q3) <sup>b</sup>                        | 176.7; 90.0–240.0     |
| Total self-reported sitting time (Med; Q1, Q3) <sup>b</sup> | 475.0; 383.0–599.0    |
| Accelerometer-derived sedentary time (M ± SD) <sup>b</sup>  | 580.4 ± 97.7          |

M = mean; SD = standard deviation, Med = median, Q1 = quartile 1, Q3 = quartile 3

<sup>a</sup> Derived from the SF-36 questionnaire

<sup>b</sup> Expressed in minutes/day

doi:10.1371/journal.pone.0133175.t001

## Diurnal patterns of accelerometer-derived sedentary time

Overall, accelerometer-derived sedentary time was lowest during the morning and highest during the evening. During the morning, participants spend 30.20 (S.E. = 0.34) minutes/hour sedentary. This increased with 9.64 (S.E. = 0.32,  $p < 0.001$ ) and 10.88 (S.E. = 0.34,  $p < 0.001$ ) minutes/hour during the afternoon and evening, respectively. The difference of 1.23 (S.E. = 0.34) minutes/hour between afternoon and evening was also statistically significant ( $p < 0.001$ ).

Significant interaction effects with diurnal pattern were observed for age and marital status (Table 2). In both age groups sedentary times increased throughout the day (Fig 1A), but the increase between afternoon and evening was significantly stronger in participants younger than 75 years compared to those aged 75 years and older ( $b = 1.93$ ,  $SE = 0.66$ ,  $p < 0.01$ ). This resulted in participants younger than 75 years being as sedentary as those aged 75 years and older during the evening, while during the morning ( $b = 2.90$ ,  $SE = 0.61$ ,  $p < 0.001$ ) and afternoon ( $b = 3.58$ ,  $SE = 0.62$ ,  $p < 0.001$ ) the older age group was more sedentary than the younger group.

Sedentary time significantly increased between morning and afternoon in the three marital status subgroups (Fig 1B). Between afternoon and evening sedentary time significantly increased among married participants ( $b = 3.15$ ,  $SE = 0.48$ ,  $p < 0.001$ ), but not among non-married ( $b = 1.60$ ,  $SE = 0.95$ ,  $p = 0.09$ ) and widowed participants ( $b = 0.01$ ,  $SE = 0.83$ ,  $p = 0.98$ ).

**Table 2. Results of the Final Model for the Diurnal Patterns.**

|                                                   | <b>b (S.E.)</b> | <b>p</b> |
|---------------------------------------------------|-----------------|----------|
| <b>Intercept</b>                                  | 28.86 (0.64)    |          |
| <b>MAIN EFFECTS</b>                               |                 |          |
| <b>SEGMENT OF THE DAY</b> (ref. = morning)        |                 |          |
| Afternoon                                         | 9.32 (0.45)     | < 0.001  |
| Evening                                           | 12.47 (0.47)    | < 0.001  |
| <b>Age</b> (ref. = < 75 years)                    | 2.90 (0.61)     | < 0.001  |
| <b>Gender</b> (ref. = men)                        | -1.86 (0.47)    | < 0.001  |
| <b>Education</b> (ref. = primary)                 |                 |          |
| Secondary                                         | 0.48 (0.58)     | 0.42     |
| Tertiary                                          | 0.52 (0.60)     | 0.38     |
| <b>Marital status</b> (ref. = married/cohabiting) |                 |          |
| Widowed                                           | 1.60 (0.76)     | 0.04     |
| Never married / divorced                          | 2.26 (0.90)     | 0.01     |
| <b>INTERACTION EFFECTS</b>                        |                 |          |
| <b>Pattern * Age</b>                              |                 |          |
| Afternoon * $\geq 75$ years                       | 0.68 (0.65)     | 0.30     |
| Evening * $\geq 75$ years                         | -1.24 (0.65)    | 0.06     |
| <b>Pattern * Marital status</b>                   |                 |          |
| Afternoon * widowed                               | 0.59 (0.81)     | 0.47     |
| Evening * widowed                                 | -2.54 (0.81)    | <0.01    |
| Afternoon * Never married / divorced              | -1.12 (0.96)    | 0.25     |
| Evening * Never married / divorced                | -2.66 (0.96)    | <0.01    |

This model was adjusted for accelerometer-derived MVPA, number of valid days and number of valid hours/valid day (centered around their grand mean).

doi:10.1371/journal.pone.0133175.t002

During the morning, widowed ( $b = 1.60$ ,  $SE = 0.76$ ,  $p = 0.04$ ) and non-married participants ( $b = 2.26$ ,  $SE = 0.90$ ,  $p = 0.01$ ) were more sedentary compared to married participants. The difference between widowed and non-married participants was not statistically significant

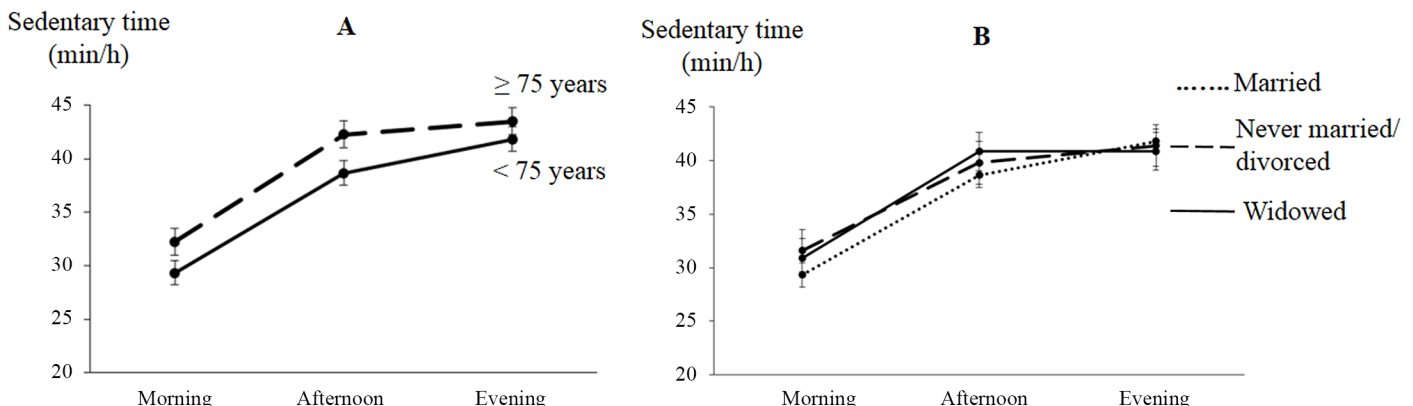

\* 95% confidence intervals of the predicted means cannot be used to make inferences about the differences in sedentary time between segments, age groups or marital status subgroups. The significance of these differences are described in the accompanying text.

**Fig 1. Diurnal patterns of sedentary behavior differed significantly according to age group (panel A) and marital status (panel B).**

doi:10.1371/journal.pone.0133175.g001

( $b = 0.67$ ,  $SE = 1.04$ ,  $p = 0.52$ ). During the afternoon, widowed participants were more sedentary compared to married participants ( $b = 2.18$ ,  $SE = 0.76$ ,  $p < 0.01$ ), but no other significant differences between marital status subgroups were observed. During the evening, no statistically significant differences in sedentary time were observed between the three marital status subgroups.

### Sociodemographic correlates of sedentary behaviors

Results of the final models are presented in Table 3. In the logistic model for driving a car, younger participants and men were, respectively, 2.38 (1 / 0.42) and 5.00 (1 / 0.20) times more likely to have driven a car. Participants with secondary or tertiary education were respectively 2.01 and 2.73 times more likely to have driven a car in the last seven days compared to those with primary education. In the gamma model we observed that, among those who had driven a car in the last 7 days, older participants and women drove 24% minutes less compared to younger participants and men.

In the logistic model for computer use, younger participants and men were 3.13 (1 / 0.32) and 1.69 (1 / 0.59) times more likely to have used the computer compared to older participants and women, respectively. Participants with secondary and tertiary education were, respectively,

**Table 3. Results of the Final Models for the Relationships between Socio-demographic Factors and Sedentary Behavior(s).**

|                                      | Driving a car                     |                                       | Computer use                       |                                       | TV viewing                       | Accelerometer-derived sedentary time <sup>4</sup> |        |
|--------------------------------------|-----------------------------------|---------------------------------------|------------------------------------|---------------------------------------|----------------------------------|---------------------------------------------------|--------|
|                                      | Logistic model <sup>1</sup>       | Gamma model <sup>2</sup><br>(n = 272) | Logistic model <sup>1</sup>        | Gamma model <sup>2</sup><br>(n = 218) | Gamma model                      | Gaussian model                                    |        |
|                                      | OR (95%C.I.)                      | Exp b (95% C.I.) <sup>3</sup>         | OR (95%C.I.)                       | Exp b (95% C.I.) <sup>3</sup>         | Exp b (95% C.I.) <sup>3</sup>    | b (S.E.)                                          | p      |
| <b>Age</b> (ref. = < 75 years)       | 0.42 (0.26, 0.68)***              | 0.76 (0.59, 0.99)*                    | 0.32 (0.20, 0.50)***               |                                       |                                  | 35.11 (7.42)                                      | <0.001 |
| <b>Gender</b> (ref. = men)           | 0.20 (0.12, 0.32)***              | 0.76 (0.59, 0.97)*                    | 0.59 (0.38, 0.91)*                 | 0.59 (0.45, 0.78)***                  |                                  | -32.26 (7.07)                                     | <0.001 |
| <b>Education</b><br>(ref. = primary) |                                   |                                       |                                    |                                       |                                  |                                                   |        |
| <b>Secondary</b>                     | 2.01 (1.12, 3.60)* <sup>a</sup>   |                                       | 3.35 (1.86, 6.01)*** <sup>a</sup>  | 1.26 (0.79, 2.02) <sup>a</sup>        | 0.91 (0.29, 1.16) <sup>a</sup>   | 12.08 (9.22) <sup>a</sup>                         | 0.19   |
| <b>Tertiary</b>                      | 2.73 (1.46, 5.12)*** <sup>a</sup> |                                       | 8.54 (4.66, 15.66)*** <sup>b</sup> | 1.63 (1.03, 2.59) <sup>a</sup>        | 0.71 (0.55, 0.90)** <sup>b</sup> | 18.23 (9.75) <sup>a</sup>                         | 0.06   |

\* $p < 0.05$

\*\* $p < 0.01$

\*\*\* $p < 0.001$

OR = odds ratio, C.I. = confidence interval, S.E. = Standard Error

<sup>a,b</sup> Categories with different indices differ significantly ( $p < 0.05$ ). Each column represents the results of one statistical model. All models were adjusted for accelerometer-derived moderate-to-vigorous physical activity (centered around its grand mean).

<sup>1</sup> The logistic model estimates the relationships between the independent variables and the odds of having driven a car / used the computer in the last 7 day.

<sup>2</sup> The gamma model estimates the relationships between the independent variables and the amount of driving a car / computer use (in minutes/day) among those who have driven a car / used the computer in the last 7 days.

<sup>3</sup> Exp b = exponent of b, all gamma models were fitted using a log link function, the exponent of the b's can be interpreted as a proportional increase in the dependent variable (in minutes/day) with a one-unit increase in the independent variable.

<sup>4</sup> Adjusted for accelerometer-derived moderate-to-vigorous physical activity, number of valid days and number of valid hours/valid day (centered around their grand mean). The intercept for this model was 603.30 (S.E. = 13.85) minutes/day.

doi:10.1371/journal.pone.0133175.t003



3.35 and 8.54 times more likely to have used the computer in the last seven days compared to participants with primary education. Compared to those with only secondary education, those with tertiary education were 2.55 (95% C.I.: 1.55, 4.18) times more likely to have used the computer. In the gamma model, among those who had used the computer, women reported 41% minutes of computer use less than men. Participants with tertiary education reported 63% more minutes/day of computer use compared to those with primary education. There was no significant difference in volume of computer use between those with primary and secondary and between those with secondary and tertiary education.

For television viewing, there was no significant difference between those with primary and secondary education, but participants with tertiary education viewed 29% and 22% (95% C.I.: 3–37%) minutes/day less television compared to those with only primary or secondary education, respectively.

A significant positive relationship was observed between age and accelerometer-derived sedentary time: older participants accumulated 35.11 sedentary minutes/day more compared to their younger counterparts. Women accumulated 32.26 sedentary minutes/day less compared to men.

No significant relationships between sociodemographic factors and self-reported total sitting time were observed. No significant relationships were observed for marital status.

## Discussion

We identified diurnal patterns that differed between sociodemographic subgroups and sociodemographic correlates of overall sedentary time and particular sedentary behaviors. Our finding that older adults were especially sedentary during the evening, confirms findings from a study among Australian older adults [22]. Furthermore, it is in line with previous studies reporting lower accelerometer counts during evening hours [18,48]. We observed interaction effects with diurnal patterns for age and marital status. These interaction effects indicated that the older age group and widowed participants were more sedentary during the morning and afternoon compared to the younger and non-widowed subgroups, but that there were no differences during the evening. For intervention development, this suggests targeting reductions in sedentary behavior during the evening as a general goal for older adults. The most effective strategies might focus upon reducing or breaking up television viewing, a typical evening activity and responsible for about 35% of the overall self-reported sitting time in our sample. Interventions targeting reductions in daytime sedentary behavior should devote special attention to older adults aged  $\geq 75$  years or widowed.

Our finding that participants aged 75 years and older accumulated more accelerometer-derived sedentary time than those aged 65 to 74 years confirms previous findings [49,50]. By contrast, we found that the older age group reported to be less likely to have driven a car and to drive less if they had driven a car. Furthermore, the older age group was less likely to have been sitting while using a computer. Possibly, the older age group engages more frequently in other particular sedentary behaviors (e.g. resting, sedentary hobbies) for which we did not study the correlates. Women reported to be less likely to have been sitting while driving a car and while using the computer and reported less minutes when they did engage in these sedentary behaviors. Furthermore, women accumulated approximately 30 minutes/day of accelerometer-derived sedentary time less than men. This supports previous studies reporting older women to be less sedentary than older men [18,49,50].

Those with secondary and tertiary education had higher odds of sitting while driving a car. This might be explained by higher educated participants having higher incomes, which has been linked to higher levels of car and driving license ownership [51]. Those with a higher

education were also more likely to have been sitting while using the computer. Furthermore, among those who had used the computer, those with tertiary education had higher volumes of computer use than those with primary education. Higher levels of computer use in older adults with higher education is possibly explained by earlier occupational computer use. In older adults with lower education, the lower computer use might have been compensated for by higher television viewing levels, resulting in no differences in self-reported total sitting time and accelerometer-derived sedentary time according to educational level. This illustrates the need for differentiating between different types of sedentary behaviors. While being as sedentary overall compared to their more-highly educated counterparts, older adults with lower educational attainment might be at increased risk for certain health outcomes due to their higher levels of TV viewing time. Previous studies have linked higher levels of television viewing to higher metabolic risk, decreased grip strength and cognitive functioning, whereas higher levels of computer use were related to increased grip strength and cognitive functioning [24,25,52]. Based on these and current findings, priority should be given to interventions targeting reductions in television viewing time among older adults with lower education.

In the behavioral epidemiology framework described by Sallis and colleagues [28], studying the factors that influence health behaviors (such as sedentary behavior) is considered the third research phase after establishing the links between the behavior and health outcomes and the development of measurement methods. Within this third phase, the identification of sociodemographic correlates of sedentary behavior is a primary purpose. Such a descriptive approach is necessary to identify subgroups of the population who are most in need for interventions. However, as proposed in the seminal work of Rose [53], in order to benefit population health more broadly, a second purpose should be to identify the environmental and other causes of high levels of sedentary time. Socio-ecological models propose individual, physical and social environmental, policy and economic factors that may influence sedentary behavior(s) and can guide such research [23,54].

We identified variations in diurnal patterns and sociodemographic correlates of sedentary behavior(s) which provides basic, but necessary, insights into the emerging field of older adults' sedentary behavior. This information can inform future intervention development. Furthermore, in line with the multi-faceted nature of sedentary behavior [19] and the differential health outcomes [24,25], we investigated the sociodemographic correlates of total sitting time/accelerometer-derived sedentary time and specific types of sedentary behaviors. However, a limitation of our study is the use of accelerometers to assess overall sedentary time as they cannot distinguish between different postures. However, accelerometers have been shown to have minimal bias compared to the activPAL-device (which does capture body position) [8]. Secondly, our self-report measure of total sitting correlated relatively weakly to accelerometer-derived sedentary time ( $\rho = 0.30$ ) [42] and we found both measures to relate differently to sociodemographic characteristics. Therefore, it would be helpful to include both self-report and objective measures of sedentary behavior in future studies. Thirdly, our sample was highly educated, viewed more television and had a higher BMI compared to the general population of Flemish older adults. We showed that levels of car driving, computer use and television viewing differed between older adults with different educational backgrounds. Therefore, the observed levels of engagement in sedentary behaviors should not be generalized to the Flemish population of older adults. However, the observed diurnal patterns did not differ according to educational attainment, suggesting that the observed patterns (increasing sedentary time throughout the day) may be applicable to older adults with a high as well as a low educational level. We did not examine the relationships between BMI and (patterns of) sedentary behaviors. Previous studies among older adults have reported higher levels of BMI to be related to higher levels of sedentary behaviors [12,13,15]. Future research could examine whether the diurnal patterns of

older adults' sedentary behaviors differ according to BMI. Fourthly, we were limited to study only three particular sedentary behaviors, because the questions targeting the remaining behaviors were not found to be reliable [42]. Fifthly, while we investigated the diurnal patterns of accelerometer-derived sedentary time, we only had information about the overall volume of specific sedentary behaviors. Future studies could use diaries to identify the times when specific sedentary behaviors take place. Lastly, older adults who were limited by their health to walk a couple of 100 meters were excluded from the current study. Therefore, our findings could not be generalized to older adults with such mobility impairment.

To conclude, our findings highlight the potential to tailor interventions aiming to reduce sedentary time to the needs of different sociodemographic subgroups of the older adult population. When addressing specific periods of the day, particular attention might be given to sedentary time during the evening. When aiming to reduce daytime sedentary time, older adults aged at least 75 years, and those widowed or non-married are important target groups. Older adults aged at least 75 years and men were at increased risk for higher levels of overall sedentary time and might, therefore, be considered as important target groups when developing interventions. Given that previous studies showed that high levels of television viewing time had more adverse health effects than other sedentary behaviors [24,25,52], the high volumes and increased risk for lower educated older adults observed in the current study, priority could be given to interventions targeting reductions in television viewing time among older adults with primary or secondary education. Interventions targeting reductions in sitting while driving a car or using the computer should devote special attention to older adults aged 65 to 74 years old, men and those with higher educational levels. Our findings provide starting points for the consideration of what might be the most appropriate programs and policies to address sedentary behaviors as a newly-understood health risk among older adults. Future research should examine which approaches are the most acceptable, feasible and effective to reduce sedentary time among older adults.

## Acknowledgments

JVC and VVH were supported by a Ph.D. Fellowship–Research Foundation Flanders (FWO). NO was supported by a National Health and Medical Research Council of Australia Program Grant (#569940), a Senior Principal Research Fellowship (#1003960) and by the Victorian Government's Operational Infrastructure Support program.

## Author Contributions

Conceived and designed the experiments: JVC VVH IDB BD. Performed the experiments: JVC VVH. Analyzed the data: JVC. Wrote the paper: JVC VVH IDB NO BD.

## References

1. Chodzko-Zajko WJ, Proctor DN, Singh MAF, Minson CT, Nigg CR, et al. (2009) Exercise and Physical Activity for Older Adults. *Medicine and Science in Sports and Exercise* 41: 1510–1530. doi: [10.1249/MSS.0b013e3181a0c95c](https://doi.org/10.1249/MSS.0b013e3181a0c95c) PMID: [19516148](https://pubmed.ncbi.nlm.nih.gov/19516148/)
2. Ainsworth BE, Haskell WL, Whitt MC, Irwin ML, Swartz AM, et al. (2000) Compendium of Physical Activities: an update of activity codes and MET intensities. *Medicine and Science in Sports and Exercise* 32: S498–S516. PMID: [10993420](https://pubmed.ncbi.nlm.nih.gov/10993420/)
3. Owen N, Healy GN, Matthews CE, Dunstan DW (2010) Too much sitting: the population health science of sedentary behavior. *Exercise and Sport Sciences Reviews* 38: 105–113. doi: [10.1097/JES.0b013e3181e373a2](https://doi.org/10.1097/JES.0b013e3181e373a2) PMID: [20577058](https://pubmed.ncbi.nlm.nih.gov/20577058/)
4. Proper KI, Singh AS, van Mechelen W, Chinapaw MJM (2011) Sedentary behaviors and health outcomes among adults: a systematic review of prospective studies. *American Journal of Preventive Medicine* 40: 174–182. doi: [10.1016/j.amepre.2010.10.015](https://doi.org/10.1016/j.amepre.2010.10.015) PMID: [21238866](https://pubmed.ncbi.nlm.nih.gov/21238866/)

5. Thorp AA, Owen N, Neuhaus M, Dunstan DW (2011) Sedentary behaviors and subsequent health outcomes in adults: a systematic review of longitudinal studies, 1996–2011. *American Journal of Preventive Medicine* 41: 207–215. doi: [10.1016/j.amepre.2011.05.004](https://doi.org/10.1016/j.amepre.2011.05.004) PMID: [21767729](https://pubmed.ncbi.nlm.nih.gov/21767729/)
6. Grontved A, Hu FB (2011) Television Viewing and Risk of Type 2 Diabetes, Cardiovascular Disease, and All-Cause Mortality: A Meta-analysis. *Jama-Journal of the American Medical Association* 305: 2448–2455.
7. de Rezende LFM, Lopes MR, Rey-Lopez JP, Matsudo VKR, Luiz OD (2014) Sedentary Behavior and Health Outcomes: An Overview of Systematic Reviews. *Plos One* 9.
8. Healy GN, Clark BK, Winkler EAH, Gardiner PA, Brown WJ, et al. (2011) Measurement of Adults' Sedentary Time in Population-Based Studies. *American Journal of Preventive Medicine* 41: 216–227. doi: [10.1016/j.amepre.2011.05.005](https://doi.org/10.1016/j.amepre.2011.05.005) PMID: [21767730](https://pubmed.ncbi.nlm.nih.gov/21767730/)
9. Rhodes RE, Mark RS, Temmel CP (2012) Adult Sedentary Behavior: A Systematic Review. *American Journal of Preventive Medicine* 42: E3–E28. doi: [10.1016/j.amepre.2011.10.020](https://doi.org/10.1016/j.amepre.2011.10.020) PMID: [22341176](https://pubmed.ncbi.nlm.nih.gov/22341176/)
10. Santos DA, Silva AM, Baptista F, Santos R, Vale S, et al. (2012) Sedentary behavior and physical activity are independently related to functional fitness in older adults. *Experimental Gerontology* 47: 908–912. doi: [10.1016/j.exger.2012.07.011](https://doi.org/10.1016/j.exger.2012.07.011) PMID: [22884978](https://pubmed.ncbi.nlm.nih.gov/22884978/)
11. George SM, Irwin ML, Matthews CE, Mayne ST, Gail MH, et al. (2010) Beyond Recreational Physical Activity: Examining Occupational and Household Activity, Transportation Activity, and Sedentary Behavior in Relation to Postmenopausal Breast Cancer Risk. *American Journal of Public Health* 100: 2288–2295. doi: [10.2105/AJPH.2009.180828](https://doi.org/10.2105/AJPH.2009.180828) PMID: [20864719](https://pubmed.ncbi.nlm.nih.gov/20864719/)
12. Inoue S, Sugiyama T, Takamiya T, Oka K, Owen N, et al. (2012) Television Viewing Time is Associated with Overweight/Obesity Among Older Adults, Independent of Meeting Physical Activity and Health Guidelines. *Journal of Epidemiology* 22: 50–56. PMID: [22156288](https://pubmed.ncbi.nlm.nih.gov/22156288/)
13. Gomez-Cabello A, Pedrero-Chamizo R, Olivares PR, Hernandez-Perera R, Rodriguez-Marroyo JA, et al. (2012) Sitting time increases the overweight and obesity risk independently of walking time in elderly people from Spain. *Maturitas* 73: 337–343. doi: [10.1016/j.maturitas.2012.09.001](https://doi.org/10.1016/j.maturitas.2012.09.001) PMID: [23021800](https://pubmed.ncbi.nlm.nih.gov/23021800/)
14. Gardiner PA, Healy GN, Eakin EG, Clark BK, Dunstan DW, et al. (2011) Associations Between Television Viewing Time and Overall Sitting Time with the Metabolic Syndrome in Older Men and Women: The Australian Diabetes Obesity and Lifestyle Study. *Journal of the American Geriatrics Society* 59: 788–796. doi: [10.1111/j.1532-5415.2011.03390.x](https://doi.org/10.1111/j.1532-5415.2011.03390.x) PMID: [21568949](https://pubmed.ncbi.nlm.nih.gov/21568949/)
15. Stamatakis E, Davis M, Stathi A, Hamer M (2012) Associations between multiple indicators of objectively-measured and self-reported sedentary behaviour and cardiometabolic risk in older adults. *Preventive Medicine* 54: 82–87. doi: [10.1016/j.ypmed.2011.10.009](https://doi.org/10.1016/j.ypmed.2011.10.009) PMID: [22057055](https://pubmed.ncbi.nlm.nih.gov/22057055/)
16. van der Ploeg HP, Chey T, Korda RJ, Banks E, Bauman A (2012) Sitting Time and All-Cause Mortality Risk in 222 497 Australian Adults. *Archives of Internal Medicine* 172: 494–500. doi: [10.1001/archinternmed.2011.2174](https://doi.org/10.1001/archinternmed.2011.2174) PMID: [22450936](https://pubmed.ncbi.nlm.nih.gov/22450936/)
17. Patel AV, Bernstein L, Deka A, Feigelson HS, Campbell PT, et al. (2010) Leisure Time Spent Sitting in Relation to Total Mortality in a Prospective Cohort of US Adults. *American Journal of Epidemiology* 172: 419–429. doi: [10.1093/aje/kwq155](https://doi.org/10.1093/aje/kwq155) PMID: [20650954](https://pubmed.ncbi.nlm.nih.gov/20650954/)
18. Arnardottir NY, Koster A, Van Domelen DR, Brychta RJ, Caserotti P, et al. (2013) Objective measurements of daily physical activity patterns and sedentary behaviour in older adults: Age, Gene/Environment Susceptibility-Reykjavik Study. *Age and Ageing* 42: 222–229. doi: [10.1093/ageing/afs160](https://doi.org/10.1093/ageing/afs160) PMID: [23117467](https://pubmed.ncbi.nlm.nih.gov/23117467/)
19. Chastin SFM, Schwarz U, Skelton DA (2013) Development of a Consensus Taxonomy of Sedentary Behaviors (SIT): Report of Delphi Round 1. *Plos One* 8.
20. Davis MG, Fox KR, Hillsdon M, Sharp DJ, Coulson JC, et al. (2011) Objectively Measured Physical Activity in a Diverse Sample of Older Urban UK Adults. *Medicine and Science in Sports and Exercise* 43: 647–654. doi: [10.1249/MSS.0b013e3181f36196](https://doi.org/10.1249/MSS.0b013e3181f36196) PMID: [20689449](https://pubmed.ncbi.nlm.nih.gov/20689449/)
21. Copeland JL, Eslinger DW (2009) Accelerometer Assessment of Physical Activity in Active, Healthy Older Adults. *Journal of Aging and Physical Activity* 17: 17–30. PMID: [19299836](https://pubmed.ncbi.nlm.nih.gov/19299836/)
22. Gardiner PA, Eakin EG, Healy GN, Owen N (2011) Feasibility of Reducing Older Adults' Sedentary Time. *American Journal of Preventive Medicine* 41: 174–177. doi: [10.1016/j.amepre.2011.03.020](https://doi.org/10.1016/j.amepre.2011.03.020) PMID: [21767725](https://pubmed.ncbi.nlm.nih.gov/21767725/)
23. Owen N, Sugiyama T, Eakin EE, Gardiner PA, Tremblay MS, et al. (2011) Adults' Sedentary Behavior Determinants and Interventions. *American Journal of Preventive Medicine* 41: 189–196. doi: [10.1016/j.amepre.2011.05.013](https://doi.org/10.1016/j.amepre.2011.05.013) PMID: [21767727](https://pubmed.ncbi.nlm.nih.gov/21767727/)

24. Kesse-Guyot E, Charreire H, Andreeva VA, Touvier M, Hercberg S, et al. (2012) Cross-Sectional and Longitudinal Associations of Different Sedentary Behaviors with Cognitive Performance in Older Adults. *Plos One* 7.
25. Nang EE, Salim A, Wu Y, Tai ES, Lee J, et al. (2013) Television screen time, but not computer use and reading time, is associated with cardio-metabolic biomarkers in a multiethnic Asian population: a cross-sectional study. *International Journal of Behavioral Nutrition and Physical Activity* 10: 70. doi: [10.1186/1479-5868-10-70](https://doi.org/10.1186/1479-5868-10-70) PMID: [23718927](https://pubmed.ncbi.nlm.nih.gov/23718927/)
26. van der Goot M, Beentjes JWJ, Van Selm M (2012) Meanings of television in older adults' lives: an analysis of change and continuity in television viewing. *Ageing & Society* 32: 147–168.
27. Haustein S, Siren A (2014) Seniors' unmet mobility needs—how important is a driving licence? *Journal of Transport Geography* 41: 45–52.
28. Sallis JF, Owen N, Fotheringham MJ (2000) Behavioral epidemiology: A systematic framework to classify phases of research on health promotion and disease prevention. *Annals of Behavioral Medicine* 22: 294–298. PMID: [11253440](https://pubmed.ncbi.nlm.nih.gov/11253440/)
29. Van Holle V, Van Cauwenberg J, Van Dyck D, Deforche B, Van de Weghe N, et al. (2014) Relationship between neighborhood walkability and older adults' physical activity: results from the Belgian Environmental Physical Activity Study in Seniors (BEPAS Seniors). *International Journal of Behavioral Nutrition and Physical Activity* 11.
30. United Nations (2014) Indicators by country for the 2014 Human Development Report. Available on: <http://hdr.undp.org/en/data>
31. Eurostat (2013) City statistics illustrated. European Commission. Available on: <http://ec.europa.eu/eurostat/cache/RSI/#?vis = city.statistics>
32. Stad Gent (2014) Gent in cijfers. Available on: <http://gent.buurtmonitor.be/quickstep/QsBasic.aspx>
33. Datawarehouse Arbeidsmarkt & Sociale Bescherming bij de KSZ (Bewerking Steunpunt WSE) (2013) Gemiddelde uittredeleeftijd in België en de gewesten, 1999, 2001, 2005–2013. Steunpunt Werk en Sociale Economie.
34. Haywood KL, Garratt AM, Fitzpatrick R (2005) Quality of life in older people: A structured review of generic self-assessed health instruments. *Quality of Life Research* 14: 1651–1668. PMID: [16119178](https://pubmed.ncbi.nlm.nih.gov/16119178/)
35. Ware JE, Kosinski M, Keller SD (1994) SF-36 Physical and mental health summary scales: a user manual and interpretation guide. Boston: The Health Institute, New England Medical Center.
36. Choi L, Ward SC, Schnelle JF, Buchowski MS (2012) Assessment of Wear/Nonwear Time Classification Algorithms for Triaxial Accelerometer. *Medicine and Science in Sports and Exercise* 44: 2009–2016. doi: [10.1249/MSS.0b013e318258cb36](https://doi.org/10.1249/MSS.0b013e318258cb36) PMID: [22525772](https://pubmed.ncbi.nlm.nih.gov/22525772/)
37. Grimm EK, Swartz AM, Hart T, Miller NE, Strath SJ (2012) Comparison of the IPAQ-Short Form and Accelerometry Predictions of Physical Activity in Older Adults. *Journal of Aging and Physical Activity* 20: 64–79. PMID: [22190120](https://pubmed.ncbi.nlm.nih.gov/22190120/)
38. Cerin E, Barnett A, Cheung MC, Sit CHP, Macfarlane DJ, et al. (2012) Reliability and Validity of the IPAQ-L in a Sample of Hong Kong Urban Older Adults: Does Neighborhood of Residence Matter? *Journal of Aging and Physical Activity* 20: 402–420. PMID: [22186607](https://pubmed.ncbi.nlm.nih.gov/22186607/)
39. Evenson KR, Buchner DM, Morland KB (2012) Objective Measurement of Physical Activity and Sedentary Behavior Among US Adults Aged 60 Years or Older. *Preventing chronic disease* 9.
40. Gardiner P, Healy GN, Eakin EG, Clark BK, Dunstan DW, et al. (2011) Associations Between Television Viewing Time and Overall Sitting Time with the Metabolic Syndrome in Older Men and Women: The Australian Diabetes Obesity and Lifestyle Study. *Journal of the American Geriatrics Society* 59: 788–796. doi: [10.1111/j.1532-5415.2011.03390.x](https://doi.org/10.1111/j.1532-5415.2011.03390.x) PMID: [21568949](https://pubmed.ncbi.nlm.nih.gov/21568949/)
41. Freedson PS, Melanson E, Sirard J (1998) Calibration of the Computer Science and Applications, Inc. accelerometer. *Medicine and Science in Sports and Exercise* 30: 777–781. PMID: [9588623](https://pubmed.ncbi.nlm.nih.gov/9588623/)
42. Van Cauwenberg J, Van Holle V, De Bourdeaudhuij I, Owen N, Deforche B (2014) Older adults' reporting of specific sedentary behaviors: validity and reliability. *Bmc Public Health* 14.
43. Rasbash J, Charlton C, Jones K, Pillinger R (2009) Manual supplement for MLwiN Version 2.14. Bristol: University of Bristol.
44. Bolker BM, Brooks ME, Clark CJ, Geange SW, Poulsen JR, et al. (2009) Generalized linear mixed models: a practical guide for ecology and evolution. *Trends in Ecology & Evolution* 24: 127–135.
45. Belgian Federal Government (2013) Enquête naar de arbeidskrachten (EAK). Algemene Directie Statistiek—België.
46. Drieskens S, Charafeddine R, Demarest S, Gisle L, Tafforeau J, et al. (2013) Health Interview Survey, Belgium, 2013: Health Interview Survey Interactive Analysis: WIV-ISP ( Brussels).

47. Van Cauwenberg J, De Donder L, Clarys P, De Bourdeaudhuij I, Owen N, et al. (2014) Relationships of Individual, Social, and Physical Environmental Factors With Older Adults' Television Viewing Time. *Journal of Aging and Physical Activity* 22: 508–517. doi: [10.1123/japa.2013-0015](https://doi.org/10.1123/japa.2013-0015) PMID: [24231688](https://pubmed.ncbi.nlm.nih.gov/24231688/)
48. Davis MG, Fox KR (2007) Physical activity patterns assessed by accelerometry in older people. *European Journal of Applied Physiology* 100: 581–589. PMID: [17063361](https://pubmed.ncbi.nlm.nih.gov/17063361/)
49. Matthews CE, Chen KY, Freedson PS, Buchowski MS, Beech BM, et al. (2008) Amount of time spent in sedentary behaviors in the united states, 2003–2004. *American Journal of Epidemiology* 167: 875–881. doi: [10.1093/aje/kwm390](https://doi.org/10.1093/aje/kwm390) PMID: [18303006](https://pubmed.ncbi.nlm.nih.gov/18303006/)
50. Buman MP, Hekler EB, Haskell WL, Pruitt L, Conway TL, et al. (2010) Objective Light-Intensity Physical Activity Associations With Rated Health in Older Adults. *American Journal of Epidemiology* 172: 1155–1165. doi: [10.1093/aje/kwq249](https://doi.org/10.1093/aje/kwq249) PMID: [20843864](https://pubmed.ncbi.nlm.nih.gov/20843864/)
51. Government F (2008) Onderzoek Verplaatsingsgedrag Vlaanderen. Department of Mobility and Public Works.
52. Hamer M, Stamatakis E (2013) Screen-Based Sedentary Behavior, Physical Activity, and Muscle Strength in the English Longitudinal Study of Ageing. *Plos One* 8.
53. Rose G (1985) Sick Individuals and Sick Populations. *International Journal of Epidemiology* 14: 32–38. PMID: [3872850](https://pubmed.ncbi.nlm.nih.gov/3872850/)
54. Owen N, Salmon J, Koohsari MJ, Turrell G, Giles-Corti B (2014) Sedentary behaviour and health: mapping environmental and social contexts to underpin chronic disease prevention. *British Journal of Sports Medicine* 48: 174–177. doi: [10.1136/bjsports-2013-093107](https://doi.org/10.1136/bjsports-2013-093107) PMID: [24415410](https://pubmed.ncbi.nlm.nih.gov/24415410/)
